# Supplementary material for: Differentially expressed genes and key molecules of BRCA1/2-mutant breast cancer: evidence from bioinformatics analyses
Source: PeerJ. 2020 Jan 21;8:e8403. doi: 10.7717/peerj.8403 (PMC6979404; doi:10.7717/peerj.8403)
Supplement: Table S1 — The overlapping genes in three independent DEGs identifications by Venn analysis. [file peerj-08-8403-s002.xlsx]

## Sheet: three comparisons
		MUT WT	MUT control	WT control
genes	regulated	logFC	logFC	logFC
C5orf46	upregulated	1.43125	2.62977	1.2033
EXO1	upregulated	1.01744	4.27155	3.26405
CLLU1OS	upregulated	2.67579	4.14931	1.47191
PFKFB1	downregulated	-1.27881	-4.64372	-3.34318
OTOG	upregulated	2.55108	5.01127	2.46366
MYOM2	downregulated	-3.24434	-5.64299	-2.41677
LGALS12	downregulated	-2.4137	-6.47223	-4.03832
C4orf51	upregulated	2.78749	4.62823	1.82268
BARHL2	upregulated	3.24134	5.40272	2.15297
DRAXIN	upregulated	1.17949	2.49627	1.31961
TICRR	upregulated	1.05174	3.09167	2.03761
DNAH9	downregulated	-1.76174	-3.20579	-1.43424
ABCA10	downregulated	-1.41755	-4.56679	-3.14065
HPSE2	downregulated	-1.90341	-5.11887	-3.22638
A2ML1	upregulated	2.0158	4.3012	2.27262
USP41	upregulated	1.99448	4.57829	2.56898
GABRQ	upregulated	2.4375	6.57308	4.0936
TUBB4A	upregulated	2.6702	4.14136	1.43168
RNASE10	upregulated	1.82842	4.13991	2.28798
MEX3A	upregulated	1.11614	2.9917	1.87483
SEMA6D	downregulated	-1.43561	-2.61707	-1.19145
NPBWR1	upregulated	2.31675	4.16453	1.83208
NME2	upregulated	1.2589	2.65626	1.36525
ZAR1L	upregulated	2.14999	3.43082	1.27603
CA4	downregulated	-3.11093	-8.47999	-5.35221
TBX10	upregulated	3.93789	6.62534	2.61468
CAPN11	downregulated	-1.91337	-3.2346	-1.35581
NME1	upregulated	1.17562	2.85302	1.65991
RELN	downregulated	-1.74642	-4.4034	-2.66404
CT45A10	upregulated	4.45532	7.65621	3.21953
TMSB15A	upregulated	1.78548	3.45162	1.66353
NLRP7	upregulated	3.25702	4.97486	1.70587
CENPW	upregulated	1.03827	2.46788	1.43383
BTNL9	downregulated	-1.49011	-5.22578	-3.72414
NNAT	downregulated	-1.5452	-4.7253	-3.15509
TCF24	upregulated	2.56004	5.71117	3.13815
SRD5A2	upregulated	2.30113	4.35139	2.0661
MAOA	downregulated	-1.89447	-4.54917	-2.65284
CCNE1	upregulated	1.1255	3.27969	2.1545
TTK	upregulated	1.00259	3.68733	2.68555
RAD21L1	upregulated	3.39313	4.83653	1.42643
COL20A1	upregulated	2.82227	4.01936	1.24032
SLC4A4	downregulated	-2.06822	-3.47959	-1.36607

## Sheet: MUT VS WT AND MUT VS control
genes	regulated	MUT vs WT	MUT vs control
MC4R	upregulated	3.04236	3.2209
C6orf15	upregulated	2.73434	2.85623
SERPINB2	upregulated	2.40017	2.76172
METTL7B	upregulated	1.68679	1.32788
TMEM74B	upregulated	2.17962	2.78181
LGR5	upregulated	4.19104	3.52691
LY6D	upregulated	2.65225	2.27442
FXYD4	upregulated	2.71291	3.75141
KRT36	upregulated	3.02112	3.79231
KRT20	upregulated	7.4116	8.0309
CALCA	upregulated	5.0766	4.67055
TTC34	downregulated	-1.47164	-1.56231
PI15	downregulated	-2.84485	-3.32472
GFRA3	upregulated	2.18582	2.48999
KRT78	upregulated	2.59988	2.46946
KRTAP10-9	upregulated	3.6946	4.01616
PRKCG	upregulated	2.39617	3.0213
GJB6	upregulated	2.99977	2.56287
CRLF1	upregulated	2.1315	2.7583
OTOP1	upregulated	3.53569	3.82777
TMEM207	upregulated	3.01469	3.85789
KRT6A	upregulated	2.68022	2.71592
LRRTM2	downregulated	-1.90439	-2.93842
SLC12A3	upregulated	2.96773	4.00156
TTR	upregulated	3.09503	4.28616
ACSM1	downregulated	-3.34928	-3.96261
EPHX3	upregulated	2.86994	3.28053
ZNF385D	downregulated	-1.60411	-1.97102
PNPLA5	upregulated	4.34334	3.98377
PZP	downregulated	-5.70892	-1.62562
IGLON5	upregulated	1.5764	2.17704
GBP4	upregulated	1.35157	1.37148
TAT	downregulated	-3.41609	-3.91958
PLSCR5	upregulated	2.8267	2.04885
GPR128	upregulated	6.3809	3.44737
ADRB1	downregulated	-2.54409	-3.26848
CTSV	upregulated	1.42196	2.03505
KCNJ16	downregulated	-4.97105	-6.04825
GBP1	upregulated	1.19396	1.77033
FBXO39	upregulated	1.52359	1.91715
KLK10	upregulated	2.86935	2.01819
RAX	upregulated	2.04676	3.44294
SPSB4	upregulated	1.55035	1.48527
CYP2A7	downregulated	-8.95024	-2.11835
IGSF23	upregulated	3.10599	4.00277
HAPLN3	upregulated	1.30604	1.30122
USH1C	upregulated	3.30913	3.24545
ONECUT3	upregulated	4.03452	4.94685
RTL1	upregulated	6.50364	6.52617
KRT83	upregulated	2.85987	3.08537
SPIN2A	downregulated	-2.24985	-1.22186
RGSL1	upregulated	2.11479	2.19134
SNPH	upregulated	1.99277	2.83876
GABRR3	upregulated	3.56474	4.23309
LIPG	upregulated	1.57433	1.71391
ARHGAP36	downregulated	-5.96435	-4.43592
SYNPO2L	downregulated	-3.70459	-3.57657
LHX3	upregulated	2.66759	4.23297
AC007163.2	upregulated	3.66855	5.48811
ECEL1	upregulated	4.25268	4.11583
S100A2	upregulated	3.35064	3.20943
MUC5AC	upregulated	2.63918	3.26136
TFF2	upregulated	2.51721	3.22487
ALB	downregulated	-3.78753	-4.42378
MAGEA9	upregulated	4.08316	6.23929
LGI1	downregulated	-5.81552	-3.2863
HOXA11	upregulated	1.73813	2.67169
FAM9C	upregulated	4.67864	3.66668
KRT222	downregulated	-2.12804	-2.26505
UCP1	downregulated	-3.99117	-1.66377
TCN1	upregulated	2.89104	2.41217
TOB1	upregulated	1.02883	1.32201
GRIA1	downregulated	-5.43901	-4.67131
APOA2	upregulated	3.09037	4.22083
LECT1	upregulated	4.39046	4.27843
PIWIL2	downregulated	-1.69788	-2.33747
LCT	upregulated	1.92031	2.70019
DEFB4A	upregulated	4.26592	4.72382
C7orf61	upregulated	1.96894	1.41887
SUSD2	upregulated	1.63704	2.53536
ESX1	upregulated	4.01885	3.52546
QRICH2	upregulated	1.31731	1.76255
ENSG00000269741	upregulated	3.55692	2.83302
CLDN18	downregulated	-2.61013	-1.17172
CYP4F3	upregulated	2.17831	2.45733
RYR2	upregulated	1.58915	1.39786
GPR179	upregulated	1.72164	1.47438
PSMA8	upregulated	2.34899	1.66994
VWA5B1	upregulated	2.19188	2.17363
NME1-NME2	upregulated	1.13684	1.77319
RP11-812E19.9	upregulated	2.79316	2.51766
AMDHD1	upregulated	2.00785	2.07088
POU3F4	upregulated	3.60876	3.16974
CHP2	upregulated	2.95758	1.88057
FGF10	downregulated	-3.1364	-2.47073
GRIK1	downregulated	-4.34739	-3.23379
FBN3	upregulated	2.6061	3.70269
RTP3	upregulated	3.83959	4.22969
NLRP11	upregulated	3.02857	2.70361
RGS5	downregulated	-1.54675	-1.59655
SLC22A10	upregulated	1.99859	2.91803
KLK14	upregulated	3.74957	3.54236
CITED1	downregulated	-2.89364	-3.99777
C5orf46	upregulated	1.43125	2.62977
EXO1	upregulated	1.01744	4.27155
CLLU1OS	upregulated	2.67579	4.14931
PFKFB1	downregulated	-1.27881	-4.64372
OTOG	upregulated	2.55108	5.01127
MYOM2	downregulated	-3.24434	-5.64299
LGALS12	downregulated	-2.4137	-6.47223
C4orf51	upregulated	2.78749	4.62823
BARHL2	upregulated	3.24134	5.40272
DRAXIN	upregulated	1.17949	2.49627
TICRR	upregulated	1.05174	3.09167
DNAH9	downregulated	-1.76174	-3.20579
ABCA10	downregulated	-1.41755	-4.56679
HPSE2	downregulated	-1.90341	-5.11887
A2ML1	upregulated	2.0158	4.3012
USP41	upregulated	1.99448	4.57829
GABRQ	upregulated	2.4375	6.57308
TUBB4A	upregulated	2.6702	4.14136
RNASE10	upregulated	1.82842	4.13991
MEX3A	upregulated	1.11614	2.9917
SEMA6D	downregulated	-1.43561	-2.61707
NPBWR1	upregulated	2.31675	4.16453
NME2	upregulated	1.2589	2.65626
ZAR1L	upregulated	2.14999	3.43082
CA4	downregulated	-3.11093	-8.47999
TBX10	upregulated	3.93789	6.62534
CAPN11	downregulated	-1.91337	-3.2346
NME1	upregulated	1.17562	2.85302
RELN	downregulated	-1.74642	-4.4034
CT45A10	upregulated	4.45532	7.65621
TMSB15A	upregulated	1.78548	3.45162
NLRP7	upregulated	3.25702	4.97486
CENPW	upregulated	1.03827	2.46788
BTNL9	downregulated	-1.49011	-5.22578
NNAT	downregulated	-1.5452	-4.7253
TCF24	upregulated	2.56004	5.71117
SRD5A2	upregulated	2.30113	4.35139
MAOA	downregulated	-1.89447	-4.54917
CCNE1	upregulated	1.1255	3.27969
TTK	upregulated	1.00259	3.68733
RAD21L1	upregulated	3.39313	4.83653
COL20A1	upregulated	2.82227	4.01936
SLC4A4	downregulated	-2.06822	-3.47959
